# Supplementary material for: LncRNA HAGLROS promotes breast cancer evolution through miR-135b-3p/COL10A1 axis and exosome-mediated macrophage M2 polarization
Source: Springer Nature journal article supplement (doi:10.1038/s41419-024-07020-x), 2024-08-28
Supplement: MOESM1 [file 41419_2024_7020_MOESM1_ESM.pdf]

1 **Supplementary material**

2

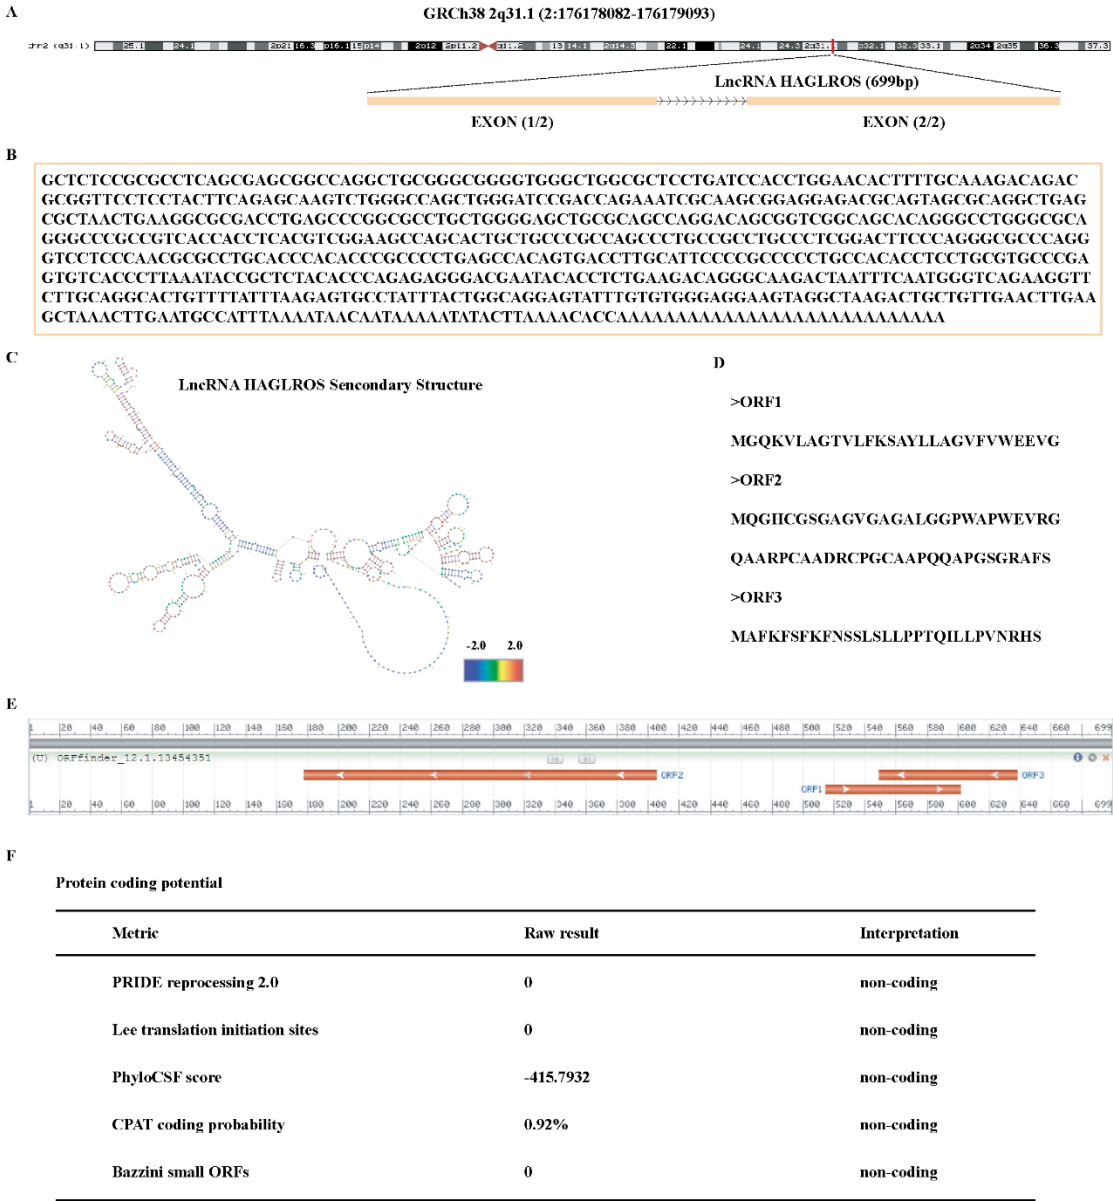

3

4 **Supplementary Fig.1 The sequence, secondary structure and coding capacity of**

5 **lncRNA HAGLROS.** (A) Schematic diagram of the human lncRNA HAGLROS

6 genomic locus. Orange rectangles represent exons. (B) The sequence of lncRNA

7 HAGLROS. (C) The secondary structure of lncRNA HAGLROS from AnnoLnc

8 database. (D) ORF Finder predicts ORFs of lncRNA HAGLROS. (E) The amino acid

9 sequences of proteins. (F) The coding potential of lncRNA HAGLROS was measured

10 by 5 different metrics.

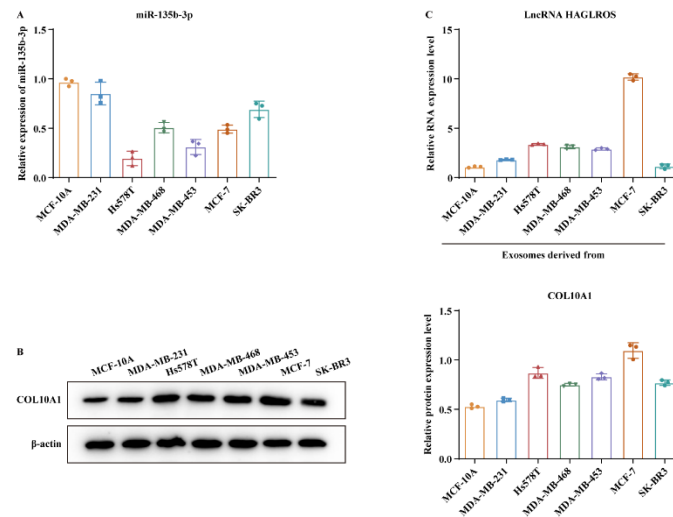

**Supplementary Fig.2 Expression of miR-135b-3, COL10A1 and lncRNA HAGLROS in different cell lines and exosomes.** (A) The expression of miR-135b-3p in breast epithelial cells and breast cancer cells was detected by qRT-PCR assay. GAPDH was used as an internal control. (B) The protein expression of COL10A1 in breast epithelial cells and breast cancer cells was detected by western blotting assay. (C) The expression of lncRNA HAGLROS in exosomes derived from breast epithelial cells and breast cancer cells was detected by qRT-PCR assay. GAPDH was used as an internal control.

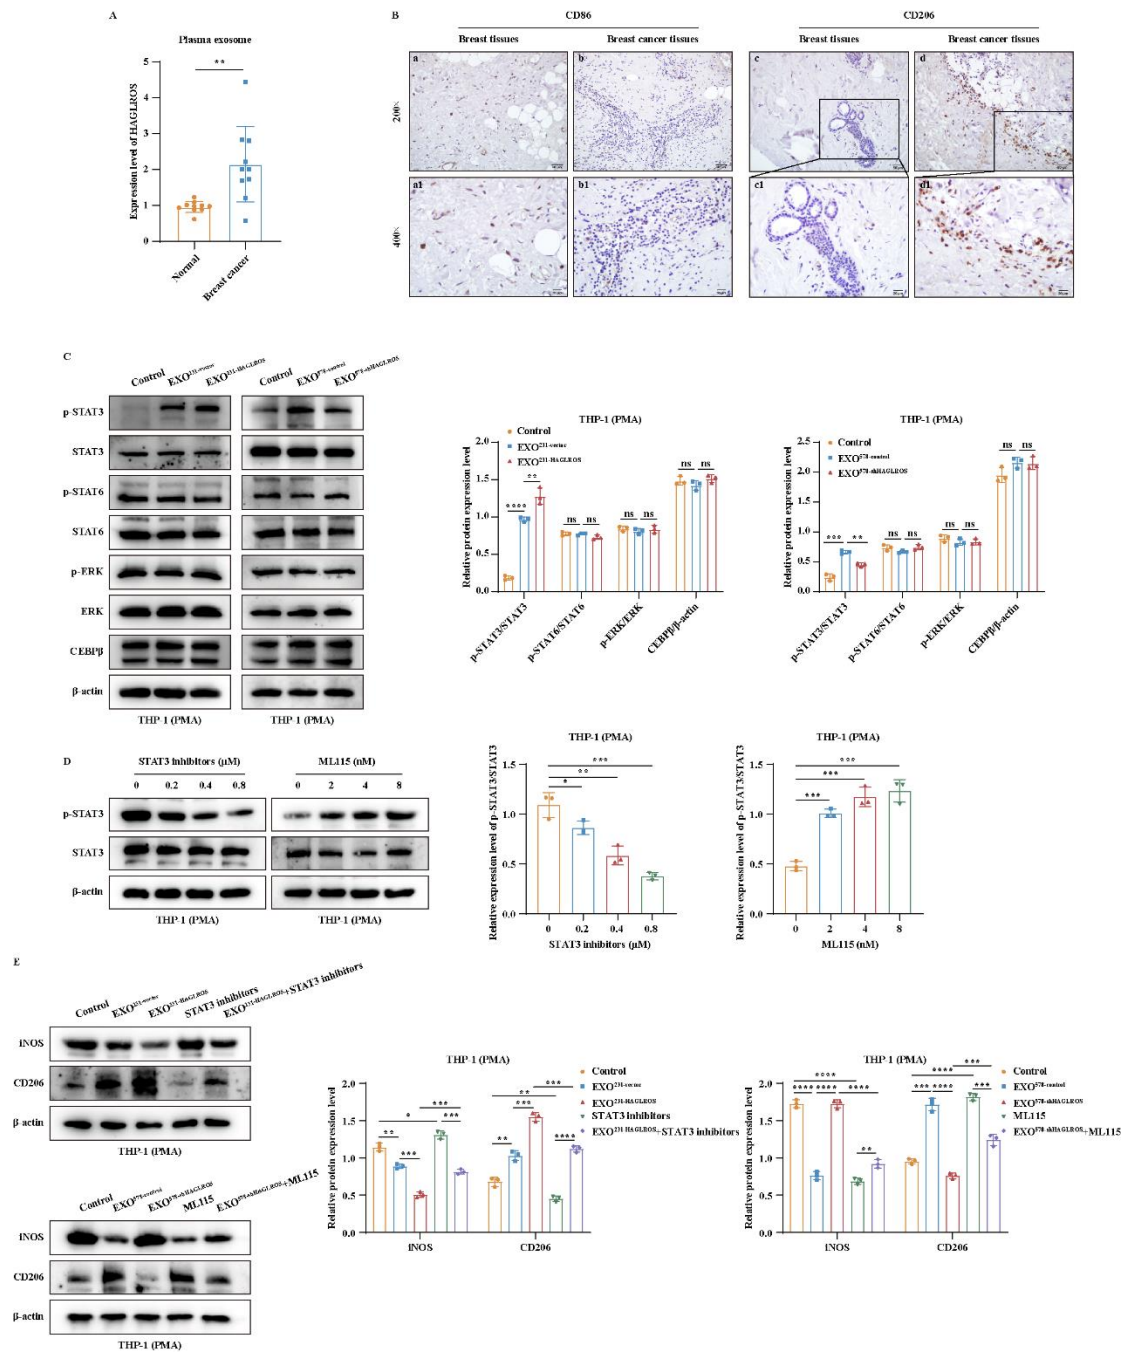

**Supplementary Fig.3 Breast cancer cell-derived exosomal lncRNA HAGLROS promotes TAM/M2 polarization through the p-STAT3 signaling pathway.** (A) The expression of lncRNA HAGLROS in plasma exosomes from breast cancer and healthy populations was examined by qRT-PCR assay. (B) The expression of CD86 and CD206 in breast cancer and paracancerous tissues was examined by IHC assay. (C) The protein expression levels of p-STAT3, STAT3, p-STAT6, STAT6, p-ERK, ERK, and CEBP $\beta$  in THP-1 (PMA) cells treated with exosomal lncRNA HAGLROS derived from breast cancer cells were determined by western blotting assay. (D) The protein expression

29 levels of p-STAT3 and STAT3 in THP-1 (PMA) cells treated with different  
 30 concentrations of STAT3 inhibitor or agonist (ML115) were determined by western  
 31 blotting assay. (E) Macrophages were cultured with exosomes derived from breast  
 32 cancer cells differentially expressing lncRNA HAGLROS and STAT3  
 33 inhibitors/agonists, and the expression of TAM/M1 and TAM/M2 related markers in  
 34 macrophages was detected by western blotting assay.

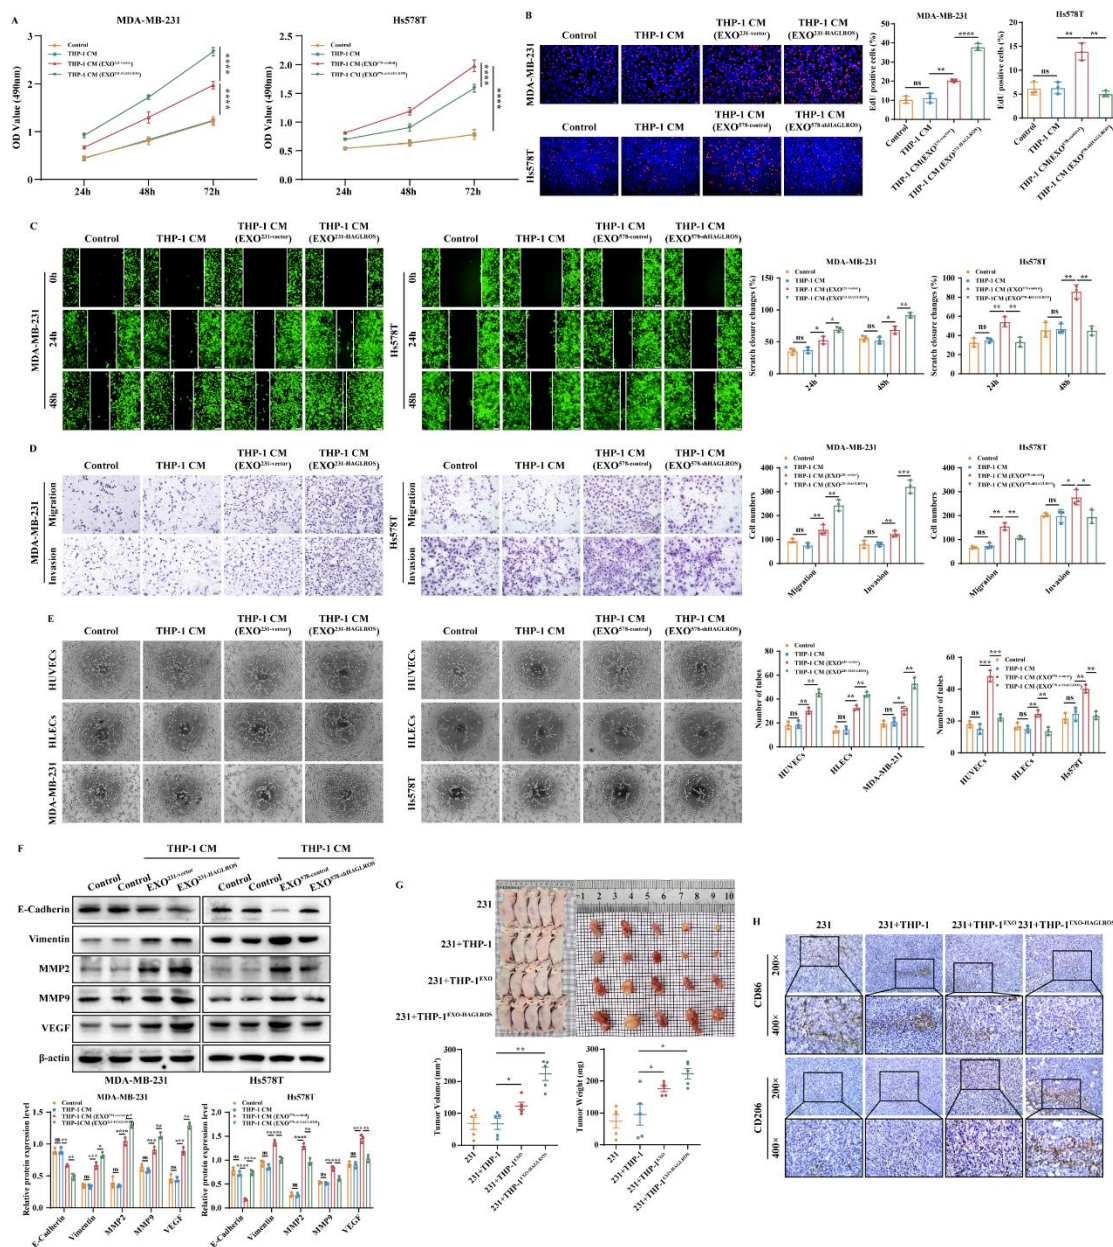

35 **Supplementary Fig.4 Exosomal lncRNA HAGLROS promotes the malignant**  
 36 **progression of breast cancer by inducing TAM/M2 polarization. (A-B) The effect**  
 37 **of macrophage supernatants treated with exosomes differentially expressing lncRNA**  
 38

HAGLROS on the proliferation ability of breast cancer cells was detected by MTT and EdU assays. (C-D) The effect of macrophage supernatants treated with exosomes differentially expressing lncRNA HAGLROS on the migration and invasion ability of breast cancer cells was detected by wound healing and Transwell assays. (E) The effect of macrophage supernatants treated with exosomes differentially expressing lncRNA HAGLROS on the angiogenesis ability of HUVECs, HLECs and breast cancer cells was detected by endothelial tube formation and VM assays. (F) The effect of macrophage supernatants treated with exosomes differentially expressing lncRNA HAGLROS on the expression levels of EMT and angiogenesis-related markers in breast cancer cells was detected by western blotting assay.  $\beta$ -actin was used as an internal control. (G) Representative images of xenograft tumors in nude mice co-injected with breast cancer cells and exosome-treated macrophages with different lncRNA HAGLROS levels, as well as the volume and weight of the tumors (n=5 per group). (H) The expression of CD86 and CD206 in the xenograft tumor tissues was detected by IHC staining.

**Supplementary Table 1. The sequences of siRNAs.**

| Sequence Name     | Sequence (5' to 3') |
|-------------------|---------------------|
| si-NC             | UUCUCCGAACGUGUCACGU |
| COL10A1 (siRNA#1) | GCAACAGCAUUAUGACCCA |
| COL10A1 (siRNA#2) | CCAAGACACAGUUCUUCAU |
| COL10A1 (siRNA#3) | CCUACACCAUAAAGAGUAA |

**Supplementary Table 2. qRT-PCR primer sequences.**

| Primer name      | Primer sequences (5' to 3') |
|------------------|-----------------------------|
| LncRNA HAGLROS-F | CTCCTGATCCACCTGGAACAC       |
| LncRNA HAGLROS-R | CTCCGCTTGCGATTTCTGG         |
| LncRNA GAPDH-F   | GTGCTCAACCAGTTGGCACC        |
| LncRNA GAPDH-R   | AGCCTCGCTCCACCTGACTT        |

|                   |                         |
|-------------------|-------------------------|
| hsa-miR-135b-3p-F | ATGTAGGGCTAAAAGCCATGGG  |
| COL10A1-F         | ATGCTGCCACAAATACCCTTT   |
| COL10A1-R         | GGTAGTGGGCCTTTTATGCCT   |
| ULBP1-F           | TAAGTCCAGACCTGAACCACA   |
| ULBP1-R           | TCCACCACGTCTCTTAGTGTT   |
| SIX4-F            | AGCAGCTCTGGTACAAGGC     |
| SIX4-R            | CTTGAAACAATACACCGTCTCCT |
| SHISA9-F          | TCGGGCGACTTCATCTTCTG    |
| SHISA9-R          | TGATGTAGACGATCAGGTTGGT  |
| CKAP2L-F          | GAGCCAAAACACCAAGCCTTA   |
| CKAP2L-R          | GGAGTTTAATGCTGATGGACCTT |
| DYNAP-F           | CCAGCCGCCAATCACACAT     |
| DYNAP-R           | TGGGAGAGACATCACTGGTTAT  |
| GAPDH-F           | GGAGCGAGATCCCTCCAAAAT   |
| GAPDH-R           | GGCTGTTGTCATACTTCTCATGG |
| CD206-F           | TCCGGGTGCTGTTCTCCTA     |
| CD206-R           | CCAGTCTGTTTTTGATGGCACT  |
| CD163-F           | TTTGTCAACTTGAGTCCCTTCAC |
| CD163-R           | TCCCGCTACACTTGTTTTTCAC  |
| Arg-1-F           | GTGGAAACTTGCATGGACAAC   |
| Arg-1-R           | AATCCTGGCACATCGGGAATC   |
| CD86-F            | CTGCTCATCTATACACGGTTACC |
| CD86-R            | GGAAACGTCGTACAGTTCTGTG  |
| iNOS-F            | TTCAGTATCACAACCTCAGCAAG |
| iNOS-R            | TGGACCTGCAAGTTAAAATCCC  |

57

**Supplementary Table 3. Antibody used in this work.**

| Antibody name | Catalog number | Manufacturer              | Origin |
|---------------|----------------|---------------------------|--------|
| E-Cadherin    | 14472          | Cell Signaling Technology | USA    |

|                 |            |                           |       |
|-----------------|------------|---------------------------|-------|
| ZO-1            | 8193       | Cell Signaling Technology | USA   |
| Vimentin        | 6260       | Santa Cruz                | USA   |
| Snail           | 3879       | Cell Signaling Technology | USA   |
| Slug            | 166476     | Santa Cruz                | USA   |
| Twist           | 81417      | Santa Cruz                | USA   |
| MMP2            | 13594      | Santa Cruz                | USA   |
| MMP9            | 393859     | Santa Cruz                | USA   |
| VEGF            | 7269       | Santa Cruz                | USA   |
| $\beta$ -actin  | CW0096     | CWBIO                     | China |
| COL10A1         | ab182563   | Abcam                     | USA   |
| IgG             | 30000-0-AP | Proteintech               | USA   |
| Ki67            | 23900      | Santa Cruz                | USA   |
| TSG101          | 79642      | Santa Cruz                | USA   |
| CD9             | 13118      | Santa Cruz                | USA   |
| iNOS            | 13120      | Cell Signaling Technology | USA   |
| CD86            | 28347      | Santa Cruz                | USA   |
| CD206           | 24595      | Cell Signaling Technology | USA   |
| APC-CD68        | 333809     | Biolegend                 | USA   |
| FITC-CD86       | 374203     | Biolegend                 | USA   |
| PE-CD206        | 321105     | Biolegend                 | USA   |
| STAT3           | 9139       | Cell Signaling Technology | USA   |
| p-STAT3         | 9145       | Cell Signaling Technology | USA   |
| STAT6           | 374021     | Santa Cruz                | USA   |
| p-STAT6         | 56554      | Cell Signaling Technology | USA   |
| ERK             | 48303      | Cell Signaling Technology | USA   |
| p-ERK           | 4695       | Cell Signaling Technology | USA   |
| CEBP $\beta$    | 7962       | Santa Cruz                | USA   |
| Goat anti-mouse | 2305       | ZSGB-BIO                  | China |



|                  |      |          |       |
|------------------|------|----------|-------|
| Goat anti-rabbit | 2301 | ZSGB-BIO | China |
|------------------|------|----------|-------|

58 **Supplementary Table 4. LncRNA HAGLROS expression in breast cancer patients.**

| Diagnosis             | No. of cases | LncRNA HAGLROS expression |    |    |     | Positive rates (+to++) | Strongly positive rates (+++) |
|-----------------------|--------------|---------------------------|----|----|-----|------------------------|-------------------------------|
|                       |              | -                         | +  | ++ | +++ |                        |                               |
| Breast cancer tissues | 99           | 17                        | 28 | 18 | 36  | 82.8% ***              | 36.4% ***                     |
| Breast tissues        | 79           | 58                        | 9  | 10 | 2   | 26.6%                  | 2.5%                          |

59 **Supplementary Table 5. Correlation between lncRNA HAGLROS expression and**  
60 **the clinicopathological features of breast cancer patients.**

| Variables          | No.of cases | LncRNA HAGLROS              |           | $\chi^2$ | <i>p</i> value |
|--------------------|-------------|-----------------------------|-----------|----------|----------------|
|                    |             | Strongly positive cases (%) |           |          |                |
| Age(years)         |             |                             |           | 2.347    | 0.126          |
| <50                | 23          |                             | 5 (21.7)  |          |                |
| ≥50                | 79          |                             | 29 (39.2) |          |                |
| Histological grade |             |                             |           | 2.834    | 0.092          |
| Grade 1            | -           |                             | -         |          |                |
| Grade 2            | 63          |                             | 19 (30.2) |          |                |
| Grade 3            | 29          |                             | 14 (48.3) |          |                |
| Tumor size         |             |                             |           | 0.000    | 1.000          |
| T1-T2              | 87          |                             | 29 (33.3) |          |                |
| T3-T4              | 3           |                             | 1 (33.3)  |          |                |
| LN metastasis      |             |                             |           | 5.366    | 0.021*         |
| Negative           | 48          |                             | 10 (20.8) |          |                |
| Positive           | 36          |                             | 16 (44.4) |          |                |
| Metastasis         |             |                             |           | 9.971    | 0.002**        |
| Negative           | 83          |                             | 26 (31.3) |          |                |
| Positive           | 13          |                             | 10 (76.9) |          |                |



|           |    |           |        |          |
|-----------|----|-----------|--------|----------|
| TNM stage |    |           | 30.810 | 0.000*** |
| I-II      | 59 | 9 (15.3)  |        |          |
| III-IV    | 31 | 23 (74.2) |        |          |
| ER        |    |           | 4.295  | 0.038*   |
| Negative  | 21 | 2 (9.5)   |        |          |
| Positive  | 48 | 16 (33.3) |        |          |
| PR        |    |           | 3.404  | 0.065    |
| Negative  | 28 | 4 (14.3)  |        |          |
| Positive  | 41 | 14 (34.1) |        |          |
| HER2      |    |           | 0.081  | 0.776    |
| Negative  | 21 | 5 (23.8)  |        |          |
| Positive  | 48 | 13 (27.1) |        |          |
| Ki67      |    |           | 1.573  | 0.210    |
| Negative  | 50 | 11 (22.0) |        |          |
| Positive  | 19 | 7 (36.8)  |        |          |

61 **Supplementary Table 6. Cox regression model analysis of the clinicopathological**  
62 **features in breast cancer patients.**

| Factors                      | B      | SE    | Wald  | HR     | 95%CI |           | p value |
|------------------------------|--------|-------|-------|--------|-------|-----------|---------|
|                              |        |       |       |        | Lower | Upper     |         |
| Univariate survival analyses |        |       |       |        |       |           |         |
| Age                          | 3.354  | 3.570 | 0.883 | 28.615 | 0.026 | 31272.955 | 0.347   |
| Histological grade           | 0.591  | 0.825 | 0.513 | 1.805  | 0.359 | 9.092     | 0.474   |
| Tumor size                   | -3.115 | 6.008 | 0.269 | 0.044  | 0.000 | 5767.116  | 0.604   |
| LN metastasis                | 0.993  | 0.731 | 1.846 | 2.700  | 0.644 | 11.318    | 0.174   |
| Metastasis                   | 1.978  | 0.675 | 8.571 | 7.225  | 1.922 | 27.154    | 0.003** |
| TNM stage                    | 3.111  | 1.071 | 8.435 | 22.448 | 2.750 | 183.232   | 0.004** |
| ER                           | -0.509 | 0.673 | 0.572 | 0.601  | 0.161 | 2.248     | 0.449   |
| PR                           | -0.381 | 0.675 | 0.319 | 0.683  | 0.182 | 2.565     | 0.572   |

|                                       |        |       |       |        |       |         |         |
|---------------------------------------|--------|-------|-------|--------|-------|---------|---------|
| HER2                                  | 0.219  | 0.803 | 0.074 | 1.245  | 0.258 | 6.007   | 0.785   |
| KI67                                  | -0.371 | 0.802 | 0.214 | 0.690  | 0.143 | 3.323   | 0.644   |
| LncRNA HAGLROS expression             | 2.485  | 0.805 | 9.533 | 11.995 | 2.478 | 58.068  | 0.002** |
| <b>Multivariate survival analyses</b> |        |       |       |        |       |         |         |
| TNM stage                             | 1.413  | 1.338 | 1.114 | 4.107  | 0.298 | 56.586  | 0.291   |
| Metastasis                            | 0.376  | 0.810 | 0.215 | 1.456  | 0.298 | 7.117   | 0.643   |
| LncRNA HAGLROS expression             | 2.506  | 1.268 | 3.910 | 12.261 | 1.022 | 147.040 | 0.048*  |
